# 1 Lost Opportunity in Tobacco Cessation 2 Care: Impact of Underbilling in a Large 3 Health System 4

---

5 Derek J Baughman, MD<sup>1</sup>; Marcus Rauhut, MPS<sup>2</sup>; Edward Anselm, MD<sup>3</sup>

- 6 1. Telemedicine Physician, WellSpan Health | Dept. Biomedical Informatics, Vanderbilt University  
7 [baughman.derek@gmail.com](mailto:baughman.derek@gmail.com)
- 8 2. Senior Specialist - Research & Development, WellSpan Health  
9 [mrauhut@wellspan.org](mailto:mrauhut@wellspan.org)
- 10 3. Assistant Clinical Professor of Medicine, Icahn School of Medicine at Mount Sinai  
11 [eanselm@msn.com](mailto:eanselm@msn.com)

12  
13  
14  
15  
16  
17  
18  
19  
20  
21  
22  
23  
24  
25

Manuscript Word count: **2899**

Abstract Word count: **238**

Tables: **4**

MeSH: Tobacco, Health Care Economics and Organizations, Primary Health Care, Clinical Coding, Public Health

All authors have contributed significantly to the work, meet ICMJE criteria, and approve the manuscript for submission. There are no conflicts of interest to disclose, financial or otherwise, and all study procedures were conducted under ethical standards. No funding was received for this study.

26  
27  
28  
29  
30  
31  
32  
33  
34  
35  
36  
37  
38  
39  
40  
41  
42  
43  
44  
45  
46  
47  
48

## Abstract

**Introduction:** Tobacco cessation remains a critical challenge in healthcare, with evidence-based interventions often under-utilized due to misaligned economic incentives and inadequate training. This study aims to quantify the economic impact of missed billing opportunities for tobacco cessation in a healthcare system, thereby assessing potential revenue loss and evaluating the effectiveness of systems-based approaches in enhancing tobacco cessation efforts.

**Methods:** A retrospective cohort study utilized aggregated de-identified patient health data from an 8-hospital regional health system across Pennsylvania and Maryland, from 1/1/21 to 12/31/23. The analysis focused on primary care encounters eligible for tobacco cessation counseling (CPT codes 99406 or 99407), with potential revenue calculated based on the Medicare reimbursement rate.

**Results:** Over three years, and 507,656 office visits, only 1,557 (0.3%) of encounters with persons using tobacco were billed for cessation services. The estimated total potential revenue gained if each person who was identified as using tobacco was billed consistently for tobacco cessation counseling was \$5,947,018.13, and \$1,982,339.38 annually.

**Conclusions:** The study reveals a significant gap between the potential and actual billing for tobacco cessation services, highlighting not only the financial implications of missed opportunities but the validation of health system’s public health impact. Underbilling contributes to considerable annual revenue loss and undermines primary prevention efforts against tobacco-related diseases. Our findings illuminate the need for enhanced billing practices and systemic changes, including policy improvements that influence proper billing to promote public health benefits through improved tobacco cessation interventions.

49  
50  
51  
52  
53  
54  
55  
56  
57  
58  
59  
60  
61  
62  
63  
64  
65  
66  
67  
68  
69  
70  
71

## Introduction

Despite the progress in reducing the prevalence of adult smoking in the United States, which is now at 11.5%, there are still over 28.3 million adult persons using cigarettes who could benefit from quitting.<sup>1</sup> The US prevalence of all forms of tobacco use combined is estimated at 18.7%.<sup>1</sup> According to the recent Surgeon General’s Report on Smoking Cessation (2020),<sup>2</sup> 77% of people who smoke express interest in quitting, with 55.4% of persons who smoke making a quit attempt in the previous year. Unfortunately, fewer than one-third of persons using cigarettes attempting to quit utilize evidence-based interventions like FDA-approved cessation medications or behavioral counseling.<sup>3</sup> This shortfall in the use of interventions contributes to higher relapse rates, with successful quitters often needing up to 20 attempts in the absence of counseling and medications.<sup>2</sup> Surveys show that from the patient's perspective, physicians are advising patients to quit smoking routinely but not directing them to evidence-based treatment. Each year, the National Committee for Quality Assurance (NCQA) surveys members of every health plan to explore a variety of customer satisfaction measures.<sup>4</sup> NCQA surveys for 2021 reveal that 44% of Commercial HMO members don’t receive counseling on how to quit, and fewer than 40% of patients have discussions about medications. These national survey data, repeated yearly, show that even when clinicians provide advice to quit, that intervention is often incomplete, lacking discussion of medication and cessation strategies. NCQA data may have significant response bias, which may lead to under-reporting of prevalence and overstatement of cessation interventions.<sup>5</sup> Another perspective on tobacco cessation interventions comes from the National Health Interview Surveys, which stated that 63% of smokers reported physician advice to quit, and 6.2% were given a prescription in the most recent year sampled.<sup>6</sup>

72 Sadagna, et. Al. reported that in a large contemporary US registry, only 1 in 3 persons using  
73 cigarettes presenting for cardiology visits received smoking cessation assistance.<sup>7</sup> Further,  
74 several reports looking at administrative data reveal significant variation and overall  
75 underperformance in the provision of smoking cessation services,<sup>8,9,10</sup> which were attributed to  
76 barriers like time constraints, lack of training, and low reimbursement. In a Medicaid claims  
77 analysis across 37 states (where an average of 9.4% of people who smoke attempted to quit  
78 within the last year), cessation medication claims ranged from 0.2% to 32.9%, and an average of  
79 only 2.7% received cessation counseling (ranging from 0.1% to 5.6%).<sup>10</sup> The majority of studies  
80 on tobacco cessation are focused specifically on smoking of cigarettes, but that literature can be  
81 applied to tobacco overall. The billing and coding of services for all forms of tobacco use are the  
82 same, **Error! Bookmark not defined.**<sup>21</sup> and the FDA-approved medications containing nicotine  
83 can be used interchangeably for any treatment of nicotine dependence, and non-nicotine  
84 medications appear to be effective as well.<sup>11</sup>

85  
86 Advising a tobacco user to quit is a standard of care<sup>12</sup> which is not usually captured in  
87 administrative data. Counseling persons using tobacco for three minutes or ten minutes is a  
88 billable service. Clinical practice guidelines support the delivery of a billable, evidence-based  
89 intervention at every clinical encounter, regardless of a patient's readiness to change.<sup>13</sup> Much of  
90 what is known about clinical performance in tobacco cessation is gleaned from survey data.<sup>14</sup>  
91 Medical claims systems and EMR systems are likely to significantly under-report tobacco use  
92 status.<sup>15,16</sup> Aside from the known challenges with electronic medical records-based claims and  
93 reimbursement,<sup>17</sup> the potential revenue lost due to ineffective billing and underlying poor service  
94 delivery for cessation services remains largely unexplored. The lost revenue can be a marker for

95 indicating sub-optimal interventions in health systems and quantifying the economic impact of  
96 missed tobacco cessation care.

97

98 This study aims to evaluate the potential revenue lost in tobacco cessation care due to inadequate  
99 billing practices. Inadequate billing reflects a mix of services not provided and services  
100 provided but not billed. By using lost revenue as a proxy, the study intends to measure the  
101 potential impact of applying systems-based approaches in population health for tobacco  
102 cessation. The objective is to develop an analysis framework for researching clinical data from  
103 multiple EMRs, increasing awareness in billing practices, and ultimately enhancing the  
104 effectiveness of tobacco cessation interventions.

105

106

## Methods

### 107 Study Sample

108

109 In this cohort study, we used aggregated de-identified, patient-level health data to make  
110 population-level estimates of persons using tobacco across an 8-hospital health system,  
111 WellSpan Health. De-identified data from over 200 outpatient care locations across Pennsylvania  
112 and Maryland were mined to reveal the total number of primary care encounters eligible for  
113 tobacco cessation counseling. Over a three-year period, we examined patient's tobacco use and  
114 whether tobacco cessation counseling was billed (CPT codes 99406 or 99407). Inclusion criteria  
115 are summarized in Table 1.

116

117 Tobacco use status in electronic medical records will reflect the inconsistencies of the practices  
118 that collect this data.<sup>16</sup> Despite best practices to screen for tobacco use at every visit and update  
119 the medical record accordingly,<sup>18</sup> we recognized that many practices do not routinely capture  
120 tobacco use and may miss some tobacco users, and recent quitters might continue to be listed as  
121 current users.

122

### 123 Measures

124 For data mining and inclusion criteria, we used custom data sessions within Epic's SlicerDicer to  
125 model similar data capture and analysis across varying Electronic Medical Record (EMR)  
126 systems. Primary population filters in Epic's SlicerDicer were used to obtain comprehensive  
127 patient-level and visit-level data. The timeframe was three years between January 1, 2021, and  
128 December 31, 2023. Persons using tobacco were identified using standard ICD-10 coding based

129 on CMS standards.<sup>Error! Bookmark not defined.21</sup> Adults aged 18 and over were identified through  
130 structured data elements in the EMR indicating tobacco use status (Table 1). Patients in hospice  
131 care were excluded as CMS does not pay for tobacco cessation for this population. This  
132 identification was derived from medical history records, active problem lists, or specific tobacco  
133 cessation billing codes. We used groupers to include sub-codes and decimal versions of ICD-10  
134 codes for nicotine dependence (F17.\*), tobacco use (Z72.0), and tobacco abuse (Z71.6); these  
135 details are in the appendix.

136  
137 Regarding visit types, outpatient and telemedicine visits in the primary care service line were  
138 used exclusively, and data was reported in terms of unique patients and individual visits to  
139 provide context to the patient-to-visit ratio. Inpatient encounters, emergency department visits,  
140 and any visits by hospice patients were excluded.

141  
142 To assess the prevalence of tobacco use in our patient cohort, was calculated by dividing the  
143 number of identified persons using tobacco by the total population. This calculated prevalence  
144 was then compared to the state health department's tobacco use prevalence rates to ensure  
145 reliability.<sup>19</sup>

146  
147 To determine and compute the billing rate, we examined the subset of the tobacco-using  
148 population billed for CPT codes 99406 or 99407 during the specified study period. Patients  
149 billed once or more (but less than eight) sessions per year proxied the frequency of cessation  
150 counseling. This data was segmented to differentiate between telemedicine (including audio-  
151 only) versus office encounters. To compare the revenue loss per patient and per visit, we

152 calculated both billing rates by dividing the number of patients or visits billed for CPT codes  
153 99406 or 99407 by the total number of identified tobacco users (i.e., patients) or their total  
154 number of encounters (i.e., visits).

155  
156 To estimate the unrealized potential revenue loss, we identified persons using tobacco who were  
157 not billed for CPT codes 99406 or 99407. The reimbursement was calculated based on insurance  
158 type. Medicare reimburses up to eight cessation attempts within a 12-month period, with private  
159 plans and Medicaid typically adhering to these guidelines.<sup>20</sup> Visits that were ineligible for  
160 reimbursement due to exceeding this limit or because of the patient's hospice status were  
161 excluded from our analysis. The resulting number was then multiplied by the payer-specified  
162 reimbursement rate to estimate the financial impact of underbilling for tobacco cessation  
163 counseling services. The standard Medicare reimbursement rate for the three-minute counseling  
164 visit, 99406, was used for the calculation. The base rate of \$14.97 was multiplied by 1.4 for  
165 commercial insurance and reduced by 70% for Medicaid.<sup>21</sup> Since the majority of billable visits  
166 were for patients with Medicare, Medicaid, and commercial insurance types, these were reported.  
167 Other types of insurance and uninsured patients were removed from the estimates of missed  
168 opportunities.

169  
170 Regarding demographics, data on five variables from patients 18 years and older who had an  
171 office visit or video visit at a primary care office between January 1, 2021, and December 31,  
172 2023, was reported. The data for race and ethnicity were aggregated based on standards set by  
173 the U.S. Department of Health and Human Services and Office of Management and Budget.<sup>22</sup>  
174 The sex of the patient was based on the legal sex documented in the patient's chart. Age



175 categories were based on the patient's age at the time of the visit. Insurance data was based on  
176 the primary payer who covered the visit. Cumulative percentages of age group and insurance  
177 type exceeded 100% because patients may have had multiple encounters at different ages or with  
178 different insurance coverage during the study period. After building demographic criteria, we  
179 then grouped patients into segments based on whether they had an office visit or video visit.  
180 Cumulative percentages for visit type exceed 100% because patients may have visits using both  
181 modalities during the study period.

182  
183 The WellSpan Health Institutional Review Board (IRB) waived full ethical review, categorizing  
184 the study as "non-human subjects research" (IRB: HE-2023-101) according to the regulations  
185 established by the DHHS and the FDA under 45 CFR 46.102 and 21 CFR 50.3, respectively.

186

## 187 **Results**

188 A total of 584,631 unique patients who met the study inclusion criteria during the three-year  
189 sample period were identified. Demographics (Table 2) revealed a predominately white (83.4%)  
190 and non-Hispanic or Latino (88%) population. Over half (55.5%) were covered by commercial  
191 insurance, while Medicare accounted for 26.5% of patients and Medicaid 15.8%. There was a  
192 slightly higher representation of females (54.6%). Patients were distributed among four age  
193 groups, with the majority being older adults (22.1% aged 18-29 years, 26.2% aged 30-44 years,  
194 34.4% aged 45-64 years, and 26.9% aged 65 years and above). The primary visit modality was  
195 in-office (91.1% of patients had at least one office visit), while 13.6% of patients had at least one  
196 video visit (4.6% had both).

197

198 A total of 75,115 persons using tobacco were identified over the study timeframe, or 12.8% of  
199 the patient population (Table 3). This was comparable to the state-specific figures on tobacco use  
200 recorded at 14.4% for Maryland and 18.5% for Pennsylvania.<sup>23</sup> These patients had 507,656 total  
201 primary care encounters over the timeframe potentially eligible for receiving tobacco cessation  
202 counseling. We found only 1,277 patients, or 1.7% of eligible patients, were billed for tobacco  
203 cessation counseling during the study period.

204

205 In terms of encounters, tobacco users had 507,656 office visits (Table 2), and only 1,557 (0.3%)  
206 were billed for cessation services. Over the 3-year timeframe, patients with Medicare, Medicaid,  
207 and commercial insurance had a total of 402,498 potentially eligible visits that were not billed  
208 for tobacco cessation counseling (Table 4). Of the eligible opportunities to provide and bill for  
209 tobacco cessation services, 97% appear to have been missed. The estimated potential  
210 reimbursement for tobacco cessation care, if provided and billed consistently, was \$5,947,018.13  
211 over three years (Table 4).

212

## Discussion

213 This study found a significant gap between persons using tobacco and billed encounters for  
214 tobacco cessation care. Leveraging a large health system’s aggregated patient data, the  
215 unrealized revenue highlights two concerns in tobacco cessation care: underbilling (when  
216 billable care may have been rendered), and failure to provide care to eligible patients. The  
217 findings highlight the importance of improving billing practices, even in telemedicine, which has  
218 become increasingly common and can represent a significant proportion of the population  
219 (13.6% of our study’s participants, as shown in Table 2). Given the prevalence of tobacco use,  
220 the impact of missed opportunities to help patients quit the use of tobacco is profound.

221  
222 Our reported billing rate—1.7 % overall, is consistent with other studies.<sup>10</sup> In a recent study of an  
223 EMR-enabled smoking treatment program, the pre-intervention baseline was 2.1%.<sup>24</sup> But survey  
224 data supports persons using cigarettes’ affirmation that their doctors are providing tobacco  
225 cessation services at a much higher rate.<sup>25,14</sup> This highlights the importance of improving billing  
226 practices, even in telemedicine, which has become increasingly common and can represent a  
227 significant proportion of the population (13.6% of our study’s participants, as shown in Table 2).  
228 The billing rates for relevant CPT codes (99406 or 99407) were considerably low, despite the  
229 significant portion of the eligible population that could benefit from cessation interventions,<sup>26</sup> as  
230 indicated by the overall visit-level billing rate of only 0.3% (Table 3).

231  
232 It is important to note in our analysis that eligibility for tobacco cessation services was not static.  
233 This reflects the reality that patients’ smoking status changes over time, impacting their potential  
234 eligibility for cessation services within the study timeframe. Methodologically, if the EHR  
235 indicated the patient had quit, they would no longer trigger eligibility for cessation interventions  
236 in subsequent visits. However, our use of aggregate data does not allow for distinguishing  
237 between patients moving in and out of the health system from patients who drop off the  
238 eligibility threshold. Nonetheless, the billing rate remained consistently low at around 0.3%  
239 (Table 3) despite patient and visit numbers changing over the study timeframe. Additionally, by  
240 excluding uninsured and other unmeasured insurance from our calculations, over the three years,  
241 the potential revenue lost is still estimated at \$5,947,018.13, demonstrating a substantial financial  
242 impact. This translates to an average \$1,982,339.38 potential revenue loss per year. Moreover,

243 this is potential revenue that is not reinvested into frontline clinicians and their patients—  
244 blunting the impact of primary prevention.  
245  
246 Many studies explore the barriers to systemic implementation of tobacco cessation in detail,<sup>27,28</sup>  
247 however, there is a notable gap in the literature concerning the reimbursement perspective. The  
248 most frequently reported perceived barriers to providing cessation services were time constraints,  
249 high workload, lack of training, lack of reimbursement of smoking cessation interventions, and  
250 the physician's own smoking status.<sup>Error! Bookmark not defined.</sup> Low outcome expectancy, lack of self-  
251 efficacy, fear of losing patients, being uncomfortable discussing smoking hazards, and  
252 dissatisfaction with professional activity were also reported.<sup>Error! Bookmark not defined.,29</sup> Other  
253 studies have produced similar results in assessing effective smoking cessation intervention in  
254 primary care<sup>30</sup> and tobacco treatment guideline use and predictors among U.S. physicians by  
255 specialty.<sup>31</sup>  
256  
257 Our study's results call for a strategic healthcare policy review by every system, tracking the  
258 prevention and screening opportunity from encounter to outcome and reimbursement. In seeking  
259 to optimize systems performance in identifying persons using tobacco, accurate documentation  
260 of a visit, shaping additional treatment and follow-up, and capturing appropriate billing, AI-  
261 driven clinical billing systems have a clear potential role.<sup>32</sup> Although there is a cost to systems  
262 change, the return on investment from tobacco cessation is well established.<sup>33</sup> Additionally, the  
263 study highlights the necessity of raising awareness among medical providers and their leadership  
264 about adopting systems-based solutions to tobacco cessation with attention to documentation and  
265 billing. Well-established paradigms for systems change have been developed and evaluated.<sup>34</sup>

266 These include elements of EMR and claims system design, training, and program  
267 evaluation.<sup>35,36,37</sup> Through these actions, it is reasonable to presume improvement in tobacco  
268 cessation interventions, increased revenue for medical practices and reduced burden of tobacco-  
269 related diseases.

270

271 Our study provides valuable insight to providers measuring the potential impact of applying  
272 value-based approaches in population health for tobacco cessation. Ultimately, this research  
273 emphasizes the critical need for systemic changes that not only foster financial efficiency but  
274 also prioritize and effectively deliver public health interventions. Implementing such changes  
275 could lead to a paradigm shift in healthcare delivery, aligning financial incentives with public  
276 health goals and elevating the quality of patient care.

277

## 278 **Limitations**

279 We acknowledge several limitations of our study. First, while we provide a general framework  
280 for providers to measure the impact of undelivered tobacco cessation, our results have limited  
281 generalizability to other parts of the country outside the northeast United States as they are from  
282 one health system. A second limitation is that the estimated revenue loss is conservative.  
283 Tobacco use is not adequately captured in EHRs, and the reimbursement estimate was based on  
284 only the three-minute counseling visit (CPT 99406). Given the national prevalence of tobacco  
285 use is 18.7%,<sup>1</sup> the reported results of missed opportunities are likely understated. Third, we only  
286 considered primary care encounters. This means we excluded any other outpatient specialties  
287 that might also be offering tobacco cessation counseling. Because we filtered our data by  
288 primary care, there may be a greater burden of unrealized potential that we did not measure. The

289 current report is based entirely on EMR indicators of tobacco use and claims data and does not  
290 capture the full range of tobacco cessation services such as prescriptions and/or referral to quit  
291 lines. Future studies should attempt to capture this type of information to better distinguish  
292 between underbilling and opportunities completely missed. Finally, our study is limited by the  
293 wide variation in payer reimbursement, even for the same CPT codes, along with the cautious  
294 estimates we employed when assessing the three payers. Actual reimbursement varies by region  
295 and contract, which should be considered when interpreting our findings. Some contracts with  
296 insurers may be based on capitation, and the services may not be specifically reimbursable.  
297 However, the return on investment from smoking cessation is well established, and the rate of  
298 reimbursement underestimates the future avoided medical expense.

## 299 **Conclusion**

300 This study provides evidence of the untapped potential revenue for consistent and systematic  
301 tobacco cessation care. The marked discrepancy between eligible and billed cessation services  
302 points to either a possible broader trend of underutilizing public health interventions, or a lack of  
303 adequate validation in tobacco cessation care delivery. This highlights an opportunity to apply  
304 systems-based approaches to tobacco cessation care to improve patient outcomes and economic  
305 returns.

**Table 1.** Summary of Eligibility Parameters for Tobacco Cessation Care Billing

| Criteria                                                                                                                                                                                                                                                                           | Details <sup>a</sup>                                                                                                                                                                                                                                                       |
|------------------------------------------------------------------------------------------------------------------------------------------------------------------------------------------------------------------------------------------------------------------------------------|----------------------------------------------------------------------------------------------------------------------------------------------------------------------------------------------------------------------------------------------------------------------------|
| Eligible Encounter Codes                                                                                                                                                                                                                                                           | Level 2-5 Evaluation and Management (E/M) codes, Qualifying Current Procedural Terminology (CPT) or Healthcare Common Procedure Coding System (HCPCS) codes                                                                                                                |
| Tobacco Product Use                                                                                                                                                                                                                                                                | Use of any tobacco product, including but not limited to cigarettes, cigars, dissolvable, nicotine gels, hookah tobacco, pipe tobacco, roll-your-own tobacco, smokeless tobacco products, vapes, e-cigarettes, hookah pens, and other electronic nicotine delivery systems |
| Exclusion Criteria                                                                                                                                                                                                                                                                 | Patients with limited life expectancy, including those receiving hospice services, and any patients with medical reasons that justify not screening for tobacco use or not providing tobacco cessation interventions. <sup>b</sup>                                         |
| <sup>a</sup> List of CPT/HCPCS Codes   CMS. Accessed February 6, 2024. <a href="https://www.cms.gov/medicare/regulations-guidance/physician-self-referral/list-cpt/hcpcs-codes">https://www.cms.gov/medicare/regulations-guidance/physician-self-referral/list-cpt/hcpcs-codes</a> |                                                                                                                                                                                                                                                                            |
| <sup>b</sup> Explore Measures & Activities. Accessed February 6, 2024. <a href="https://qpp.cms.gov/mips/explore-measures">https://qpp.cms.gov/mips/explore-measures</a>                                                                                                           |                                                                                                                                                                                                                                                                            |
| Note: Tobacco cessation intervention can be performed by any healthcare provider, not necessarily the same provider who conducted the tobacco use screening. <sup>38</sup>                                                                                                         |                                                                                                                                                                                                                                                                            |

306

307 **Table 2. Patient Demographics by Visit Type, WellSpan Health (January 1, 2021 to December**  
 308 **31, 2023)**

|                                                                            | Office         | %            | Telemedicine  | %            | Total Patients <sup>a</sup> | %             |
|----------------------------------------------------------------------------|----------------|--------------|---------------|--------------|-----------------------------|---------------|
| <b>Race</b>                                                                |                |              |               |              |                             |               |
| White                                                                      | 444,142        | 83.4%        | 67,570        | 85.3%        | 487,617                     | 83.4%         |
| Other                                                                      | 36,957         | 6.9%         | 5,419         | 6.8%         | 40,005                      | 6.8%          |
| Black or African American                                                  | 25,750         | 4.8%         | 3,920         | 4.9%         | 27,724                      | 4.7%          |
| Unknown, declined, or not reported                                         | 18,301         | 3.4%         | 1,394         | 1.8%         | 21,115                      | 3.6%          |
| Asian                                                                      | 6,276          | 1.2%         | 761           | 1.0%         | 7,059                       | 1.2%          |
| American Indian, Alaska Native, Native Hawaiian and Other Pacific Islander | 1,018          | 0.2%         | 169           | 0.2%         | 1,111                       | 0.2%          |
| <b>Ethnicity</b>                                                           |                |              |               |              |                             |               |
| Not Hispanic or Latino                                                     | 469,761        | 88.2%        | 71,716        | 90.5%        | 514,657                     | 88.0%         |
| Hispanic or Latino                                                         | 38,485         | 7.2%         | 5,659         | 7.1%         | 41,633                      | 7.1%          |
| Unknown, declined, or not reported                                         | 24,198         | 4.5%         | 1,858         | 2.3%         | 28,341                      | 4.8%          |
| <b>Legal sex <sup>b</sup></b>                                              |                |              |               |              |                             |               |
| Female                                                                     | 292,413        | 54.9%        | 53,592        | 67.6%        | 319,039                     | 54.6%         |
| Male                                                                       | 239,943        | 45.1%        | 25,619        | 32.3%        | 265,498                     | 45.4%         |
| <b>Age <sup>c</sup></b>                                                    |                |              |               |              |                             |               |
| 18-29y                                                                     | 119,222        | 22.4%        | 18,305        | 23.1%        | 129,076                     | 22.1%         |
| 30-44y                                                                     | 141,613        | 26.6%        | 29,582        | 37.3%        | 153,093                     | 26.2%         |
| 45-64y                                                                     | 182,827        | 34.3%        | 29,394        | 37.1%        | 201,231                     | 34.4%         |
| 65+y                                                                       | 140,836        | 26.5%        | 13,097        | 16.5%        | 157,133                     | 26.9%         |
| <b>Insurance type <sup>d</sup></b>                                         |                |              |               |              |                             |               |
| Commercial (Highmark, Blue Cross, etc.)                                    | 294,719        | 55.4%        | 48,078        | 60.7%        | 324,457                     | 55.5%         |
| Medicare                                                                   | 140,399        | 26.4%        | 13,900        | 17.5%        | 155,162                     | 26.5%         |
| Medicaid                                                                   | 87,684         | 16.5%        | 16,457        | 20.8%        | 92,285                      | 15.8%         |
| Government/Tricare                                                         | 9,189          | 1.7%         | 1,035         | 1.3%         | 10,042                      | 1.7%          |
| Other                                                                      | 64,605         | 12.1%        | 3,488         | 4.4%         | 125,421                     | 21.5%         |
| <b>Total</b>                                                               | <b>532,444</b> | <b>91.1%</b> | <b>79,233</b> | <b>13.6%</b> | <b>584,631</b>              | <b>100.0%</b> |

<sup>a</sup> Cumulative percentages for visit types exceed 100% as patients may have both an office visit and video visit during the study period.

<sup>b</sup> Percentages are calculated based on tallies of patients' legal sex since these values remain consistent over time

<sup>c</sup> Age values can show discrepancies of approximately 5% between cohorts, primarily because some ages are recorded in months and may not be accurately accounted for in the EMR. Additionally, certain ages can change during the measurement time frame, so cumulative percentages exceed 100%.

<sup>d</sup> SlicerDicer can only measure proportions of encounters associated with the financial payer class, making them unavailable for regression analysis. Separating self-pay data from cost-sharing (co-pays and deductibles) can be challenging, resulting in imprecise measurements, as patients can switch payers within the study period. Notably, this challenge can be exacerbated in the blended group, where patients receive both types of care. In the case of Medicare and Medicaid, there might be overlap among patients with both payer types. The key insight from the payer data is the comparable distribution of percentages across exposure groups.

309



310 **Table 3. Primary Care Tobacco Cessation Counseling by Year**

311

| Category                                                                                                                                                                                                                                                                      | 2021 (%)          | 2022 (%)          | 2023 (%)          | Total (%)         | Average (%)       |
|-------------------------------------------------------------------------------------------------------------------------------------------------------------------------------------------------------------------------------------------------------------------------------|-------------------|-------------------|-------------------|-------------------|-------------------|
| <b>Patients</b>                                                                                                                                                                                                                                                               |                   |                   |                   |                   |                   |
| Total                                                                                                                                                                                                                                                                         | 405,485           | 380,204           | 375,704           | 584,631           | 387,131           |
| Persons using tobacco                                                                                                                                                                                                                                                         | 43,695<br>(10.8%) | 44,285<br>(11.6%) | 42,385<br>(11.3%) | 75,115<br>(12.8%) | 43,455<br>(11.2%) |
| Persons using tobacco billed for cessation                                                                                                                                                                                                                                    | 622 (1.4%)        | 545 (1.2%)        | 218 (0.5%)        | 1,277 (1.7%)      | 462 (1.1%)        |
| <b>Visits</b>                                                                                                                                                                                                                                                                 |                   |                   |                   |                   |                   |
| Persons using tobacco, total primary care encounters                                                                                                                                                                                                                          | 169,215           | 172,688           | 165,753           | 507,656           | 169,219           |
| Persons using tobacco, encounters billed for cessation                                                                                                                                                                                                                        | 731 (0.4%)        | 596 (0.3%)        | 230 (0.1%)        | 1,557 (0.3%)      | 519 (0.3%)        |
| Encounters with other insurance type or no insurance                                                                                                                                                                                                                          | 11,889            | 11,067            | 9,631             | 32,587            | 10,862            |
| Non-reimbursable encounters*                                                                                                                                                                                                                                                  | 24,047            | 24,508            | 22,459            | 71,014            | 23,671            |
| Unbilled encounters                                                                                                                                                                                                                                                           | <b>132,548</b>    | <b>136,517</b>    | <b>133,433</b>    | <b>402,498</b>    | <b>134,166</b>    |
| * This number reflects visits that exceed the maximum reimbursable visits for our 3 payers of interest. For example, Medicare covers up to 8 cessation attempts per year, so Medicare patients with more than 8 visits in a year will only count as having 8 eligible visits. |                   |                   |                   |                   |                   |

312

313 **Table 4: Estimated Reimbursement Based on Payer Type**

314

| Payer                 | 2021 Eligible Visits<br>(est. reimbursement) | 2022 Eligible Visits<br>(est. reimbursement) | 2023 Eligible Visits<br>(est. reimbursement) | Total Eligible Visits<br>(est. reimbursement) | Avg. Eligible Visits<br>(est. reimbursement) |
|-----------------------|----------------------------------------------|----------------------------------------------|----------------------------------------------|-----------------------------------------------|----------------------------------------------|
| Commercial<br>\$20.96 | 35,864<br>(\$751,637.71)                     | 36,359<br>(\$762,011.92)                     | 35,471<br>(\$743,401.22)                     | 107,694<br>(\$2,257,050.85)                   | 35,898<br>(\$752,350.28)                     |
| Medicare<br>\$14.97   | 41,986<br>(\$628,530.42)                     | 44,995<br>(\$673,575.15)                     | 46,779<br>(\$700,281.63)                     | 133,760<br>(\$2,002,387.20)                   | 44,587<br>(\$667,462.40)                     |
| Medicaid<br>\$10.48   | 54,698<br>(\$573,180.34)                     | 55,163<br>(\$578,053.08)                     | 51,183<br>(\$536,346.66)                     | 161,044<br>(\$1,687,580.08)                   | 53,681<br>(\$562,526.69)                     |
| <b>Total</b>          | <b>132,548</b><br><b>(\$1,953,348.47)</b>    | <b>136,517</b><br><b>(\$2,013,640.15)</b>    | <b>133,433</b><br><b>(\$1,980,029.51)</b>    | <b>402,498</b><br><b>(\$5,947,018.13)</b>     | <b>134,166</b><br><b>(\$1,982,339.38)</b>    |

315

## 316 References

- <sup>1</sup> Cornelius ME, Loretan CG, Jamal A, et al. Tobacco Product Use Among Adults - United States, 2021. *MMWR Morb Mortal Wkly Rep*. May 5 2023;72(18):475-483. doi:10.15585/mmwr.mm7218a1
- <sup>2</sup> *Smoking Cessation: A Report of the Surgeon General*. 2020. *Publications and Reports of the Surgeon General*.
- <sup>3</sup> New reference required Babb, S., et al. (2017). "Quitting smoking among adults—United States, 2000–2015." *Morbidity and Mortality Weekly Report* **65**(52): 1457-1464.
- <sup>4</sup> NCQA. Medical Assistance with Smoking and Tobacco Use Cessation. Accessed 5/15/2023, 2023. <https://www.ncqa.org/hedis/measures/medical-assistance-with-smoking-and-tobacco-use-cessation/>
- <sup>5</sup> Malloy, K., Proj, A., Battles, H., Juster, T., Ortega-Peluso, C., Wu, M., & Juster, H. (2018). Smoking cessation benefit utilization: comparing methodologies for measurement using New York State's Medicaid data. *Nicotine and Tobacco Research*, *20*(12), 1467-1473.)
- <sup>6</sup> Tibuakuu, M., Okunrintemi, V., Jirru, E., Tcheugui, J. B. E., Orimoloye, O. A., Mehta, P. K., ... & Michos, E. D. (2019). National trends in cessation counseling, prescription medication use, and associated costs among US adult cigarette smokers. *JAMA network open*, *2*(5), e194585-e194585.
- <sup>7</sup> Sardana M, Tang Y, Magnani JW, et al. Provider-Level Variation in Smoking Cessation Assistance Provided in the Cardiology Clinics: Insights From the NCDR PINNACLE Registry. *J Am Heart Assoc*. Jul 2 2019;8(13):e011412. doi:10.1161/JAHA.118.011307
- <sup>8</sup> Hoel AW, Nolan BW, Goodney PP, et al. Variation in smoking cessation after vascular operations. *J Vasc Surg*. May 2013;57(5):1338-44; quiz 1344 e1-4. doi:10.1016/j.jvs.2012.10.130
- <sup>9</sup> Goldstein MG, DePue JD, Monroe AD, et al. A population-based survey of physician smoking cessation counseling practices. *Prev Med*. Sep-Oct 1998;27(5 Pt 1):720-9. doi:10.1006/pmed.1998.0350
- <sup>10</sup> Wang X, Babb S, Xu X, Ku L, Glover-Kudon R, Armour BS. Receipt of cessation treatments among Medicaid enrollees trying to quit smoking. *Nicotine and Tobacco Research*. 2021;23(6):1074-1078.
- <sup>11</sup> Huerne, K., & Eisenberg, M. J. (2023). Vaping Cessation Interventions in Former Smokers: A Review. *Canadian Journal of Cardiology*.
- <sup>12</sup> Patnode CD, Henderson JT, Coppola EL, Melnikow J, Durbin S, Thomas RG. Interventions for Tobacco Cessation in Adults, Including Pregnant Persons: Updated Evidence Report and Systematic Review for the US Preventive Services Task Force. *JAMA*. 2021;325(3):280–298. doi:10.1001/jama.2020.23541
- <sup>13</sup> Michael C. Fiore, Douglas E. Jorenby, Timothy B. Baker, Smoking cessation: Principles and practice based upon the AHCPR Guideline, 1996, *Annals of Behavioral Medicine*, Volume 19, Issue 3, September 1997, Pages 213–219, <https://doi.org/10.1007/BF02892286>
- <sup>14</sup> United States Public Health Service Office of the Surgeon General; National Center for Chronic Disease Prevention and Health Promotion (US) Office on Smoking and Health. *Smoking Cessation: A Report of the Surgeon General*. Washington (DC): US Department of Health and Human Services; 2020.
- <sup>15</sup> Malloy, K., Proj, A., Battles, H., Juster, T., Ortega-Peluso, C., Wu, M., & Juster, H. (2018). Smoking cessation benefit utilization: comparing methodologies for measurement using New York State's Medicaid data. *Nicotine and Tobacco Research*, *20*(12), 1467-1473.
- <sup>16</sup> Patel, N., Miller Jr, D. P., Snively, A. C., Bellinger, C., Foley, K. L., Case, D., ... & Dharod, A. (2020). A comparison of smoking history in the electronic health record with self-report. *American journal of preventive medicine*, *58*(4), 591-595.
- <sup>17</sup> McCullough JM. Timing of Clinical Billing Reimbursement for a Local Health Department. *Public Health Rep*. 2016;131(2):283-289. doi:10.1177/003335491613100212

- <sup>18</sup> Tobacco, T. C. P. G. T. (2008). A clinical practice guideline for treating tobacco use and dependence: 2008 update: a US public health service report. *American journal of preventive medicine*, 35(2), 158-176.)
- <sup>19</sup> PA Department of Health. Pennsylvania Tobacco Data. Department of Health. Accessed December 8, 2023. <https://www.health.pa.gov:443/topics/programs/tobacco/Pages/Data.aspx>
- <sup>20</sup> Billing Guide for Tobacco Screening and Cessation. <https://www.lung.org/getmedia/08ed3536-6bab-48a6-a4e4-e6dbccaea024/billing-guide-for-tobacco-1.pdf>
- <sup>21</sup> Centers for Medicare & Medicaid Services. Accessed January 1, 2024. <https://www.cms.gov/medicare/physician-fee-schedule/search?Y=0&T=4&HT=1&CT=0&H1=99406&H2=99407&M=5>
- <sup>22</sup> Explanation of data standards for race, ethnicity, sex, primary language, and disability. Office of Minority Health. Accessed December 12, 2023. <https://minorityhealth.hhs.gov/explanation-data-standards-race-ethnicity-sex-primary-language-and-disability>.
- <sup>23</sup> Cornelius, M. E., Wang, T. W., Jamal, A., Loretan, C. G., Willis, G., Graham-Glover, B., & Neff, L. (2023). Peer Reviewed: State-Specific Prevalence of Adult Tobacco Product Use and Cigarette Smoking Cessation Behaviors, United States, 2018–2019. *Preventing Chronic Disease*, 20.
- <sup>24</sup> McCarthy DE, Baker TB, Zehner ME, et al. A comprehensive electronic health record-enabled smoking treatment program: Evaluating reach and effectiveness in primary care in a multiple baseline design. *Prev Med*. 2022;165(Pt B):107101. doi:10.1016/j.ypmed.2022.107101
- <sup>25</sup> Medical Assistance with Smoking and Tobacco Use Cessation. NCQA. Accessed January 16, 2024. <https://www.ncqa.org/hedis/measures/medical-assistance-with-smoking-and-tobacco-use-cessation/>
- <sup>26</sup> Stead LF, Buitrago D, Preciado N, Sanchez G, Hartmann-Boyce J, Lancaster T. Physician advice for smoking cessation. *Cochrane Database Syst Rev*. 2013;2013(5):CD000165. Published 2013 May 31. doi:10.1002/14651858.CD000165.pub4
- <sup>27</sup> Adams JM. Smoking Cessation—Progress, Barriers, and New Opportunities: The Surgeon General’s Report on Smoking Cessation. *JAMA*. 2020;323(24):2470–2471. doi:10.1001/jama.2020.6647
- <sup>28</sup> Pipe AL, Evans W, Papadakis S. Smoking cessation: health system challenges and opportunities. *Tob Control*. 2022;31(2):340-347. doi:10.1136/tobaccocontrol-2021-056575
- <sup>29</sup> Berlin, I. (2008). Physicians' perceived barriers to promoting smoking cessation. *Journal of Smoking Cessation*, 3(2), 92-100.
- <sup>30</sup> Kushnir V, Cunningham JA. Assessing effective smoking cessation intervention in primary care. *Preventive Medicine Reports*. 2015;2:181-182. doi:[10.1016/j.pmedr.2015.03.001](https://doi.org/10.1016/j.pmedr.2015.03.001)
- <sup>31</sup> Schaer DA, Singh B, Steinberg MB, Delnevo CD. Tobacco Treatment Guideline Use and Predictors Among U.S. Physicians by Specialty. *American Journal of Preventive Medicine*. 2021;61(6):882-889. doi:[10.1016/j.amepre.2021.05.014](https://doi.org/10.1016/j.amepre.2021.05.014)
- <sup>32</sup> Kilanko V. The Transformative Potential of Artificial Intelligence in Medical Billing: A Global Perspective. 2023;4(3). doi:<https://doi.org/10.51542/ijscia.v4i3.8>
- <sup>33</sup> Warner, K. E. (1997). Cost effectiveness of smoking-cessation therapies: interpretation of the evidence and implications for coverage. *Pharmacoeconomics*, 11(6), 538-549.
- <sup>34</sup> Systems Change: Treating Tobacco Use and Dependence. Content last reviewed December 2012. Agency for Healthcare Research and Quality, Rockville, MD. <https://www.ahrq.gov/prevention/guidelines/tobacco/decisionmakers/systems/index.html>
- <sup>35</sup> Burks K, Shields J, Evans J, Plumley J, Gerlach J, Flesher S. A systematic review of outpatient billing practices. *SAGE Open Medicine*. 2022;10:205031212210990. doi:<https://doi.org/10.1177/20503121221099021>

---

<sup>36</sup> Wright JS, Wall HK, Ritchey MD. Million Hearts 2022: small steps are needed for cardiovascular disease prevention. JAMA. 2018;320(18):1857-1858.

<sup>37</sup> American Academy of Family Physicians. Office Champions: A Systems Change Approach. Accessed May 5, 2024. <https://www.aafp.org/family-physician/patient-care/care-resources/tobacco-and-nicotine/office-champions.html>

<sup>38</sup> Preventive Care and Screening: Tobacco Use: Screening and Cessation Intervention | eCQI Resource Center. Accessed December 8, 2023. <https://ecqi.healthit.gov/ecqm/ec/2021/cms138v9#>
